# Supplementary material for: Design of Supply Chain Transportation Pooling Strategy for Reducing CO2 Emissions Using a Simulation-Based Methodology: A Case Study
Source: MDPI journal article supplement (doi:10.3390/su14042331), 2022-02-18

Figure S1 : Simulation model of Pooled supply chain with multi-pick

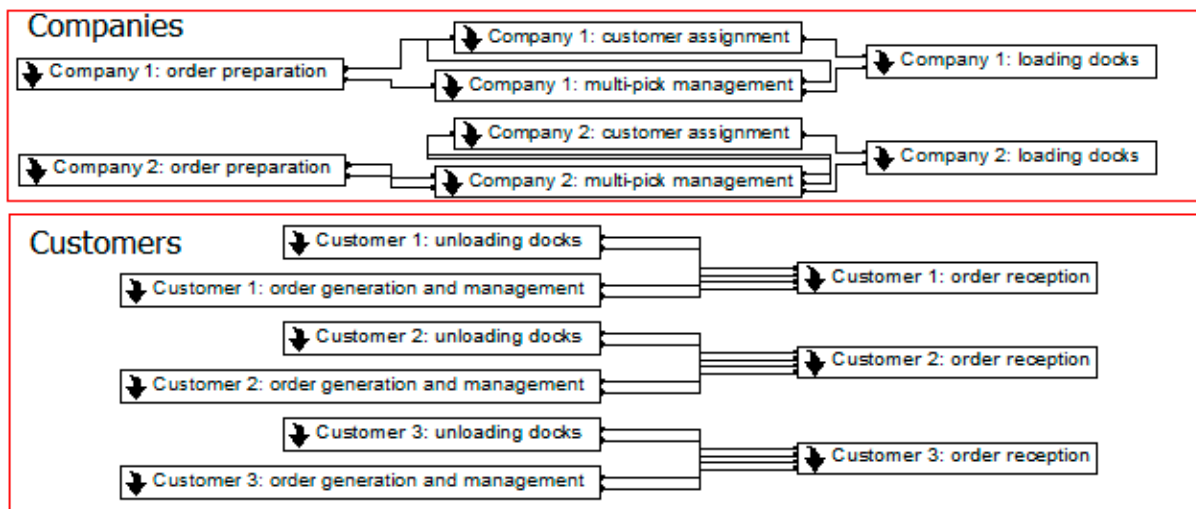

A: Simulation model overview

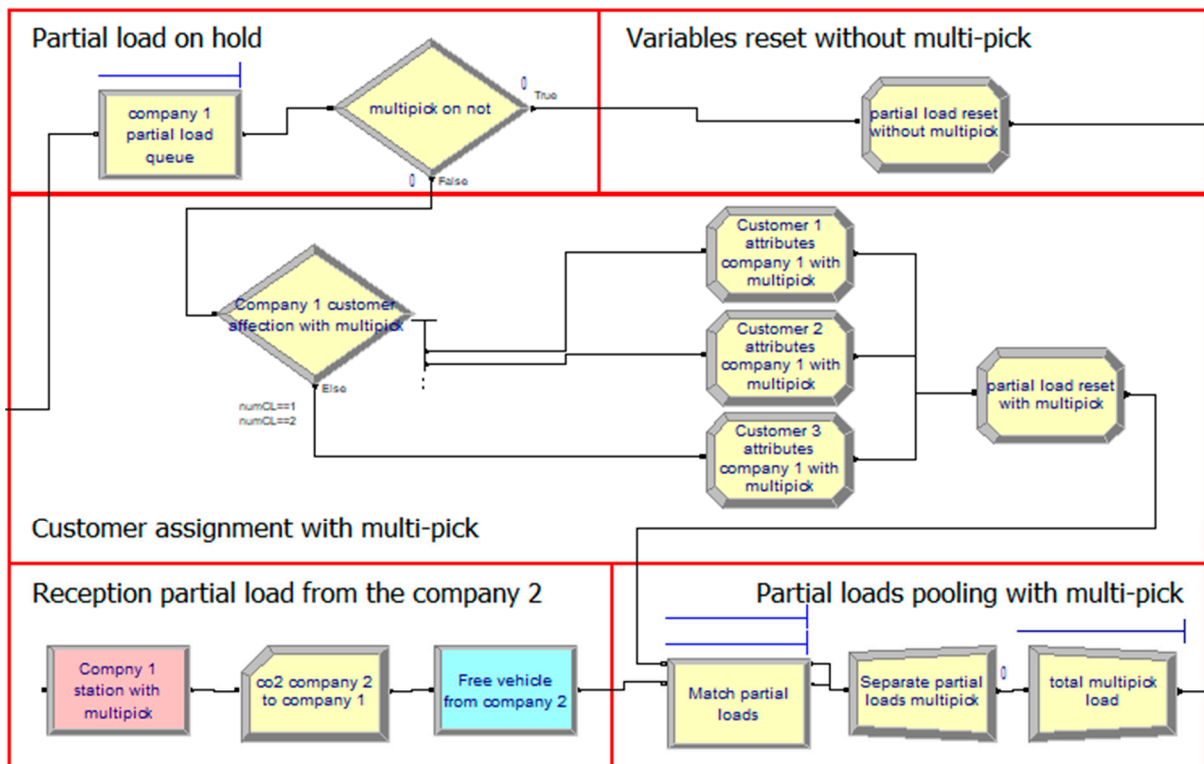

B: Company 1 multi-pick management sections

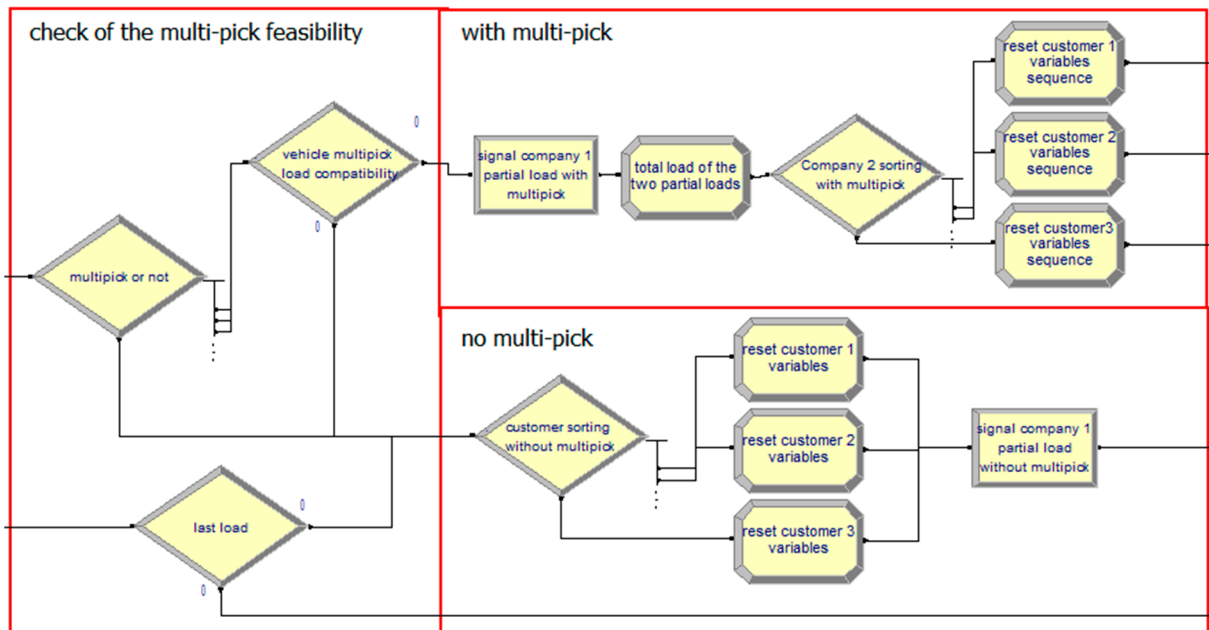

C: Company 2 multi-pick management sections

Figure S2 : Simulation model of pooled-supply chain with multi-drop

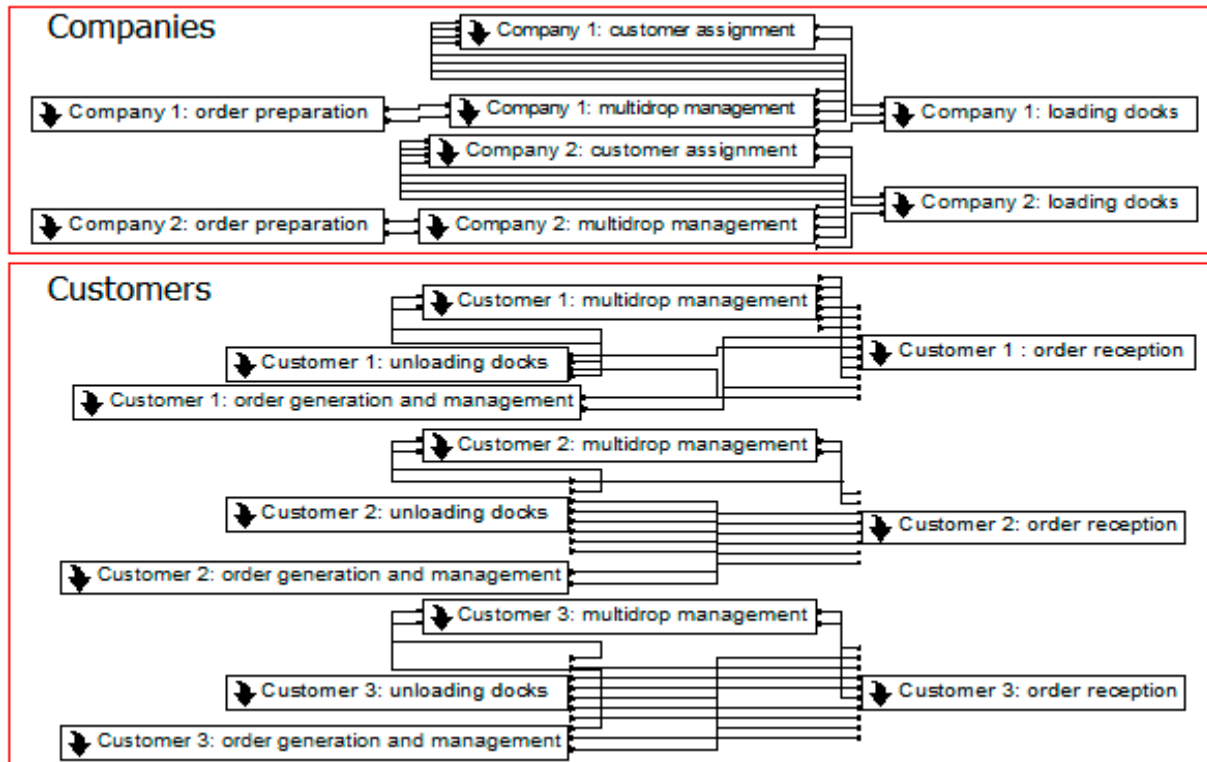

A: Simulation model overview

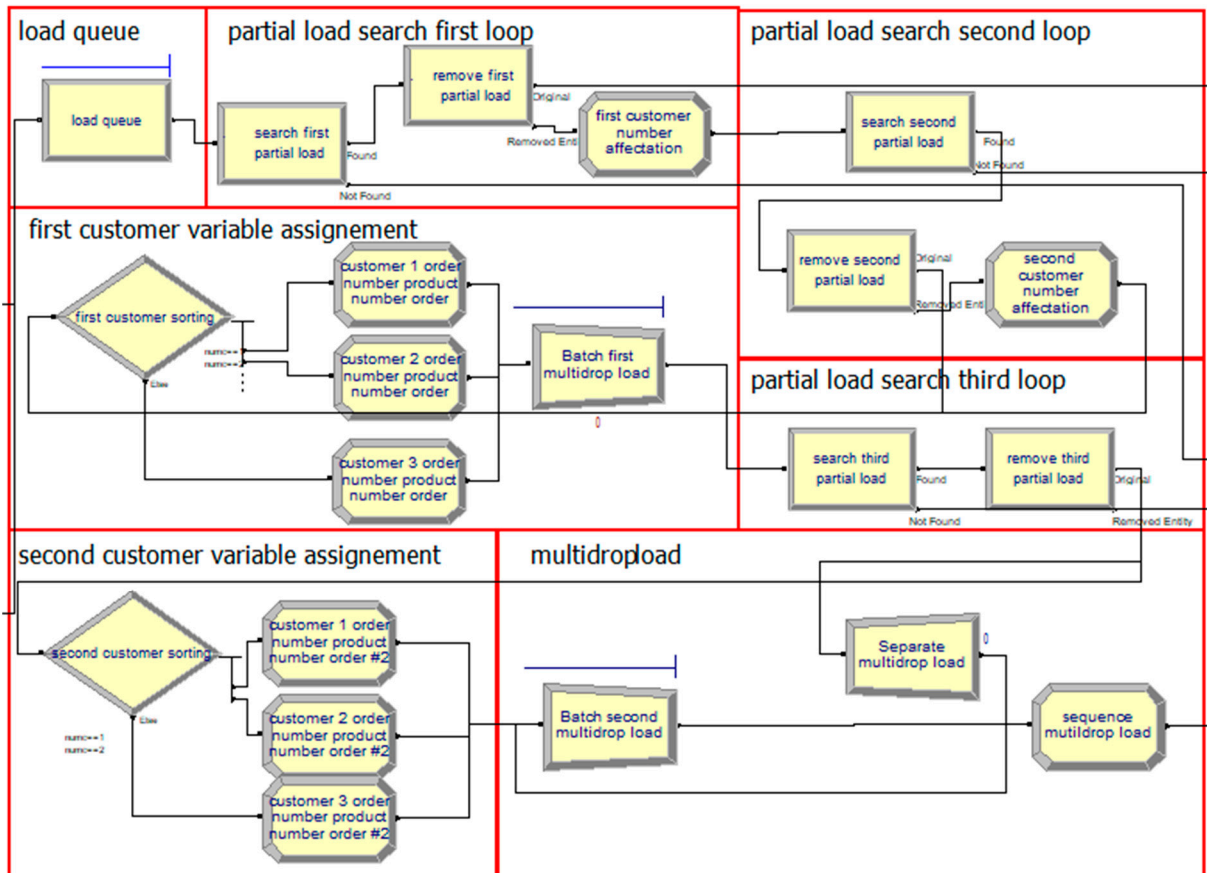

B: Company j multi-drop management section

### Customer 1: multidrop management

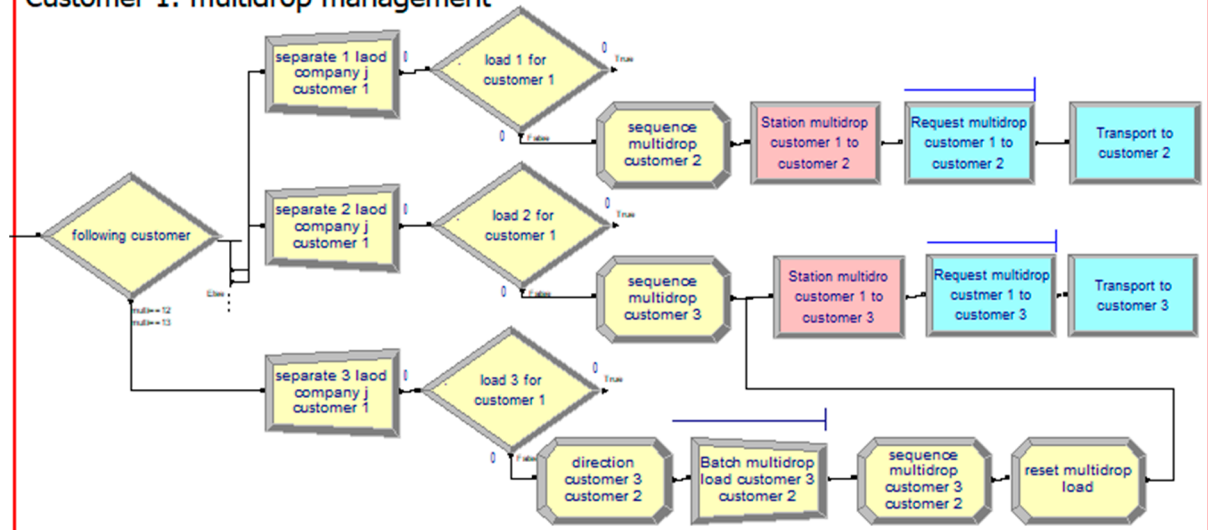

### Customer 2: multidrop management

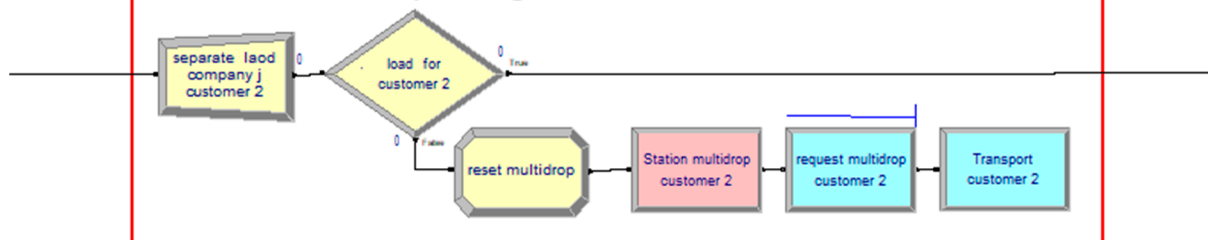

C: Customer multi-drop management sections

Figure S3 : Simulation model of pooled supply chains with hub simulation model

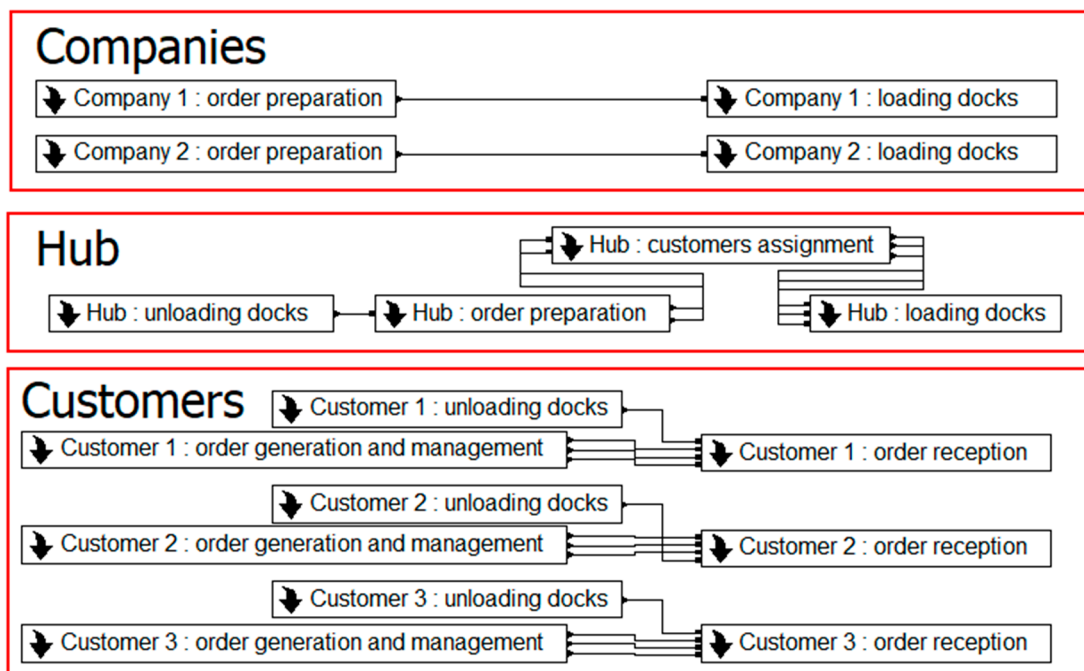

A: Simulation model overview

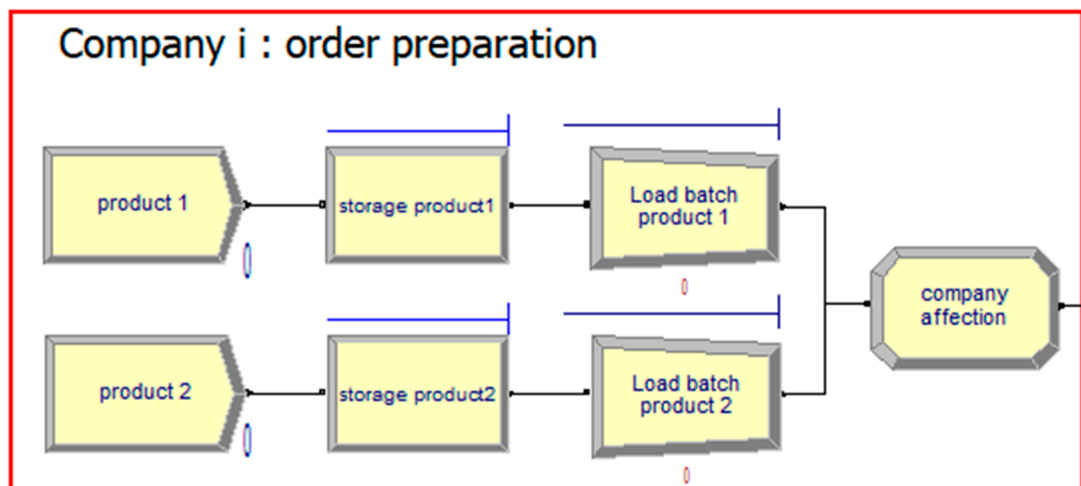

B: company i order preparation section

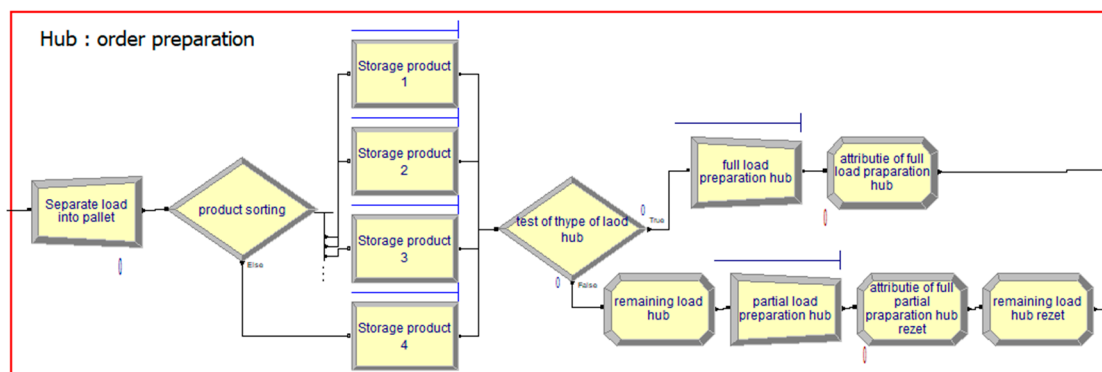

C: Hub order preparation section

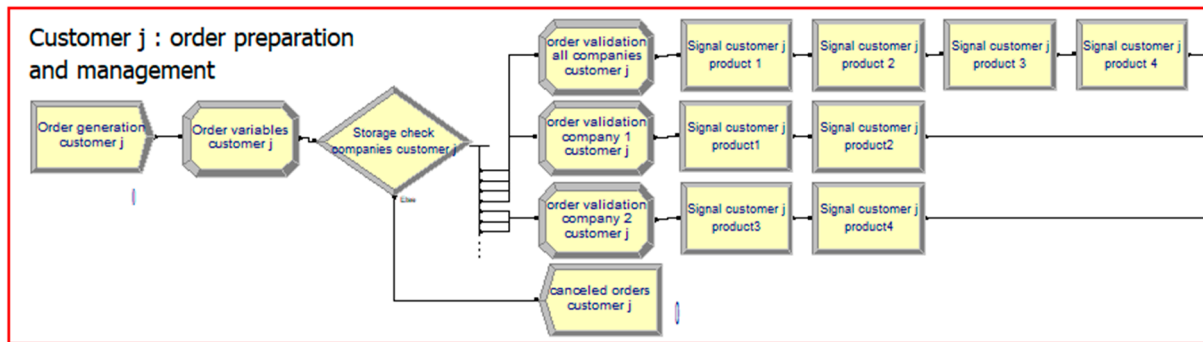

D: Customer j order generation and management section

Figure S4 : Simulation model of pooled supply chains with hub and multi-drop

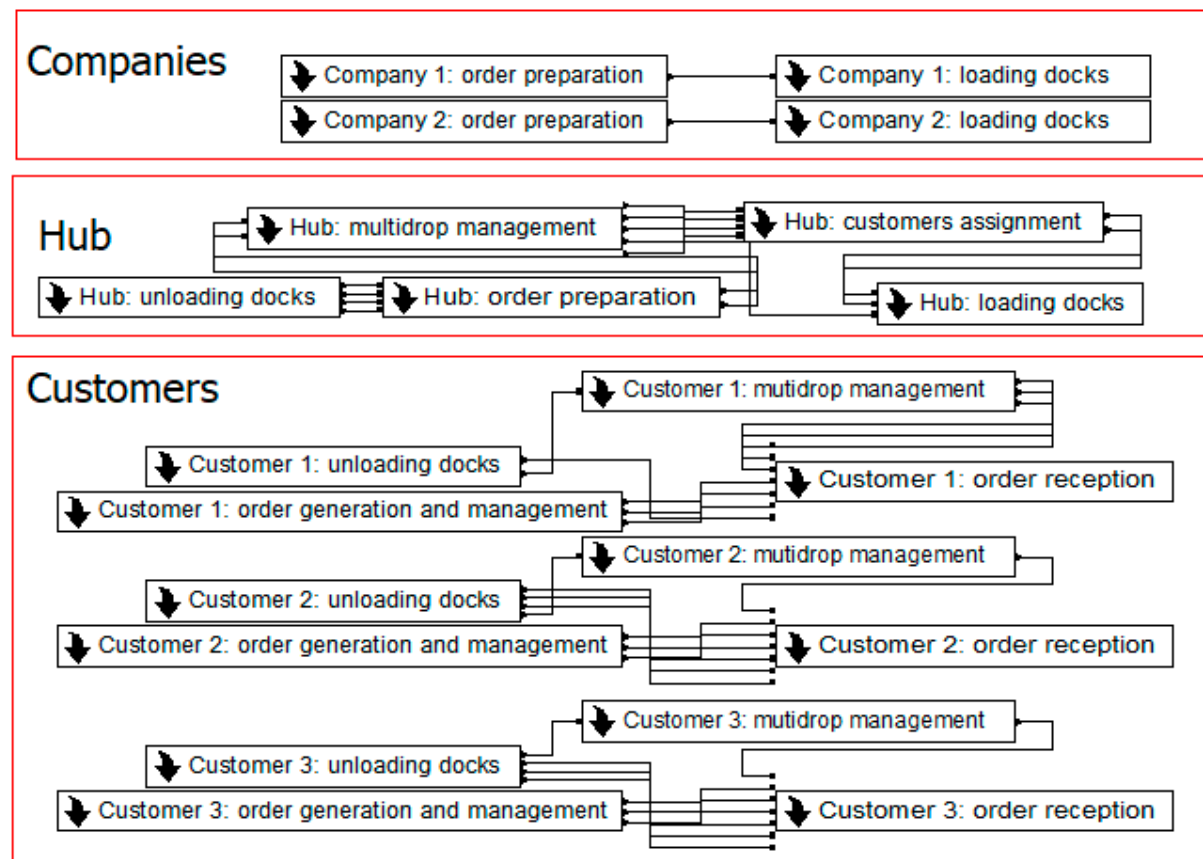

Supplement: s1 [file s1]
